# Supplementary material
Source: PubMed Central journal article supplement (PMC3775864)

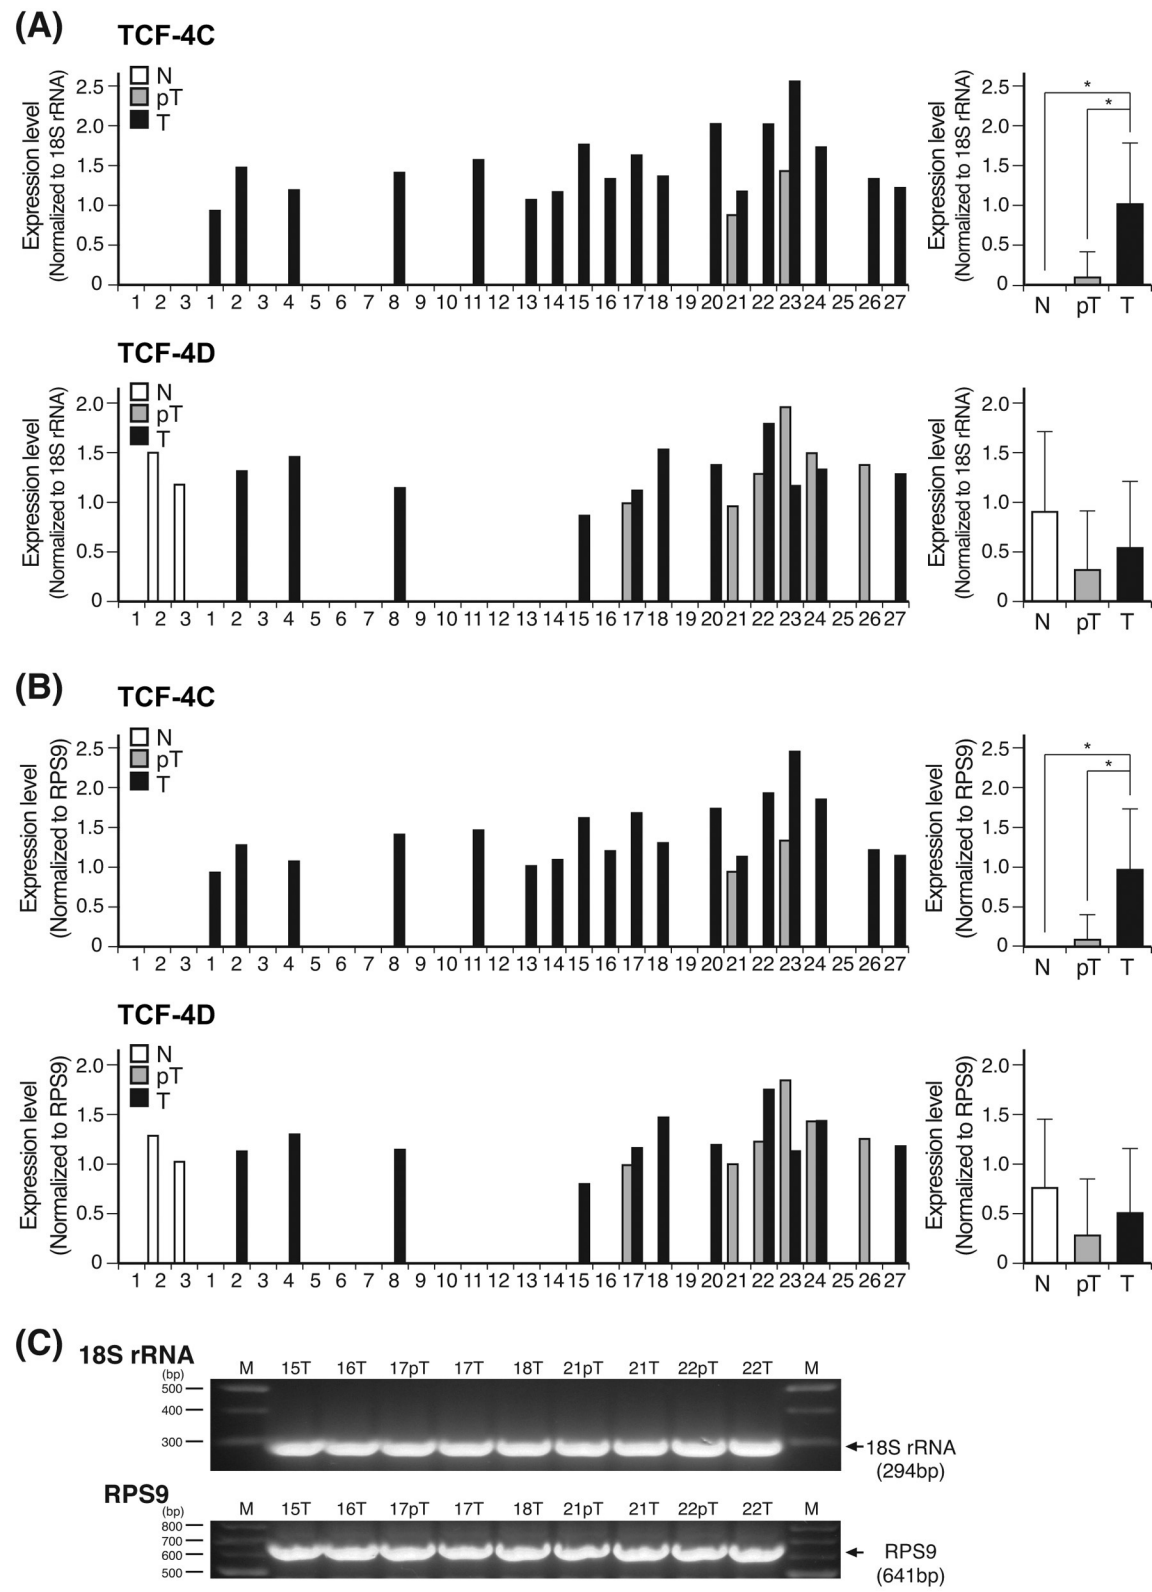

# Supplementary Figure S2

## HAK-1A

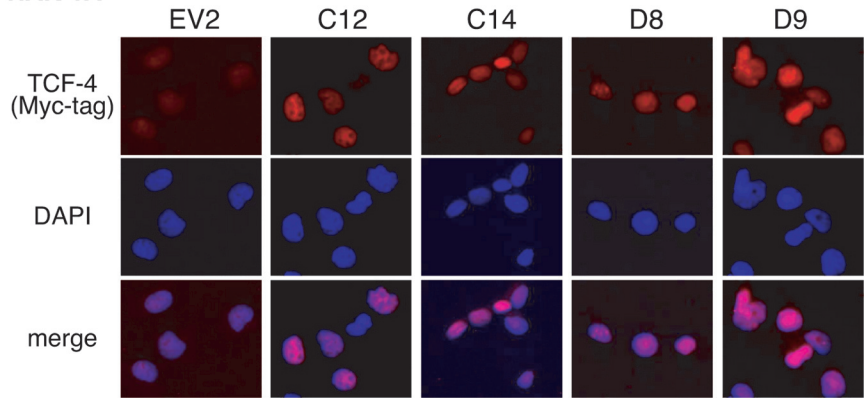

**(A) OUMS-29**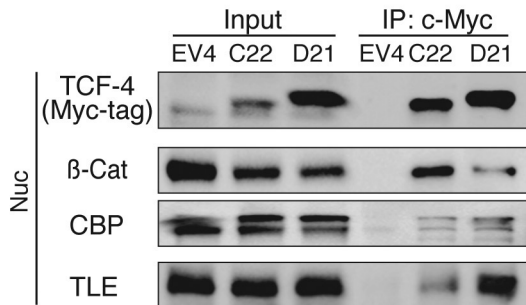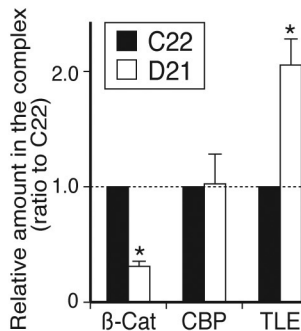**(B) HAK-1A**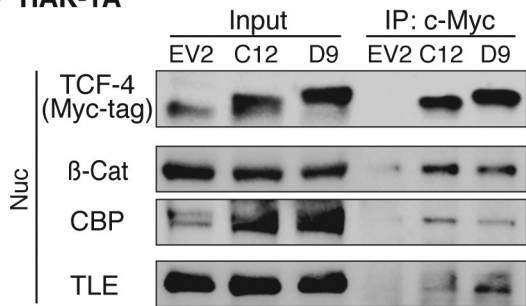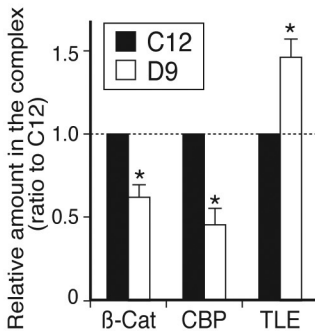

(A)

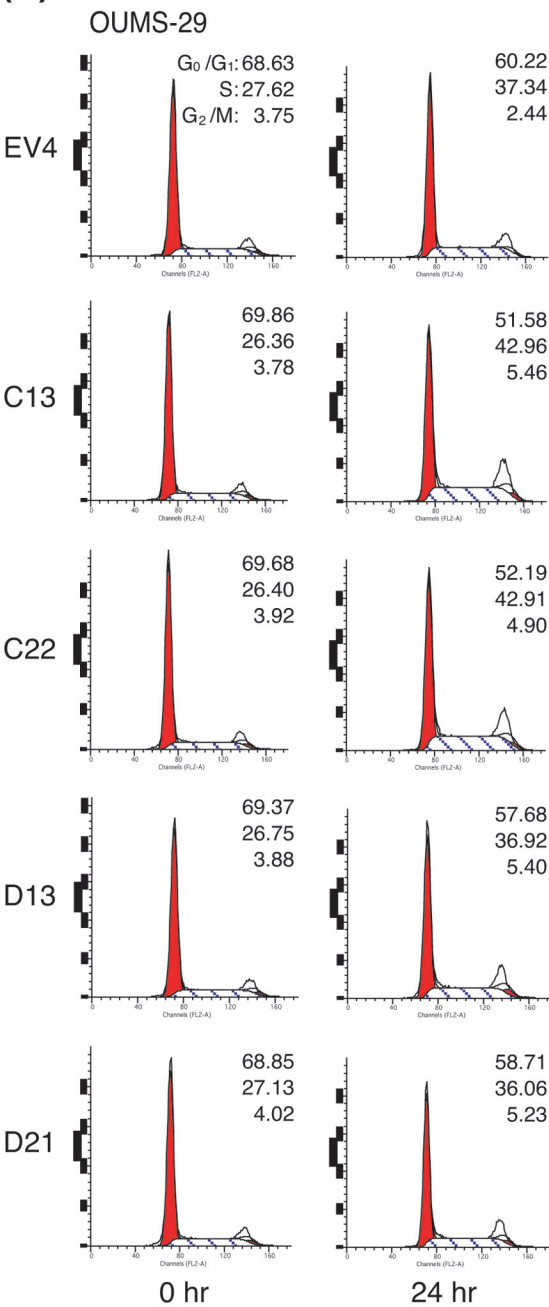

(B)

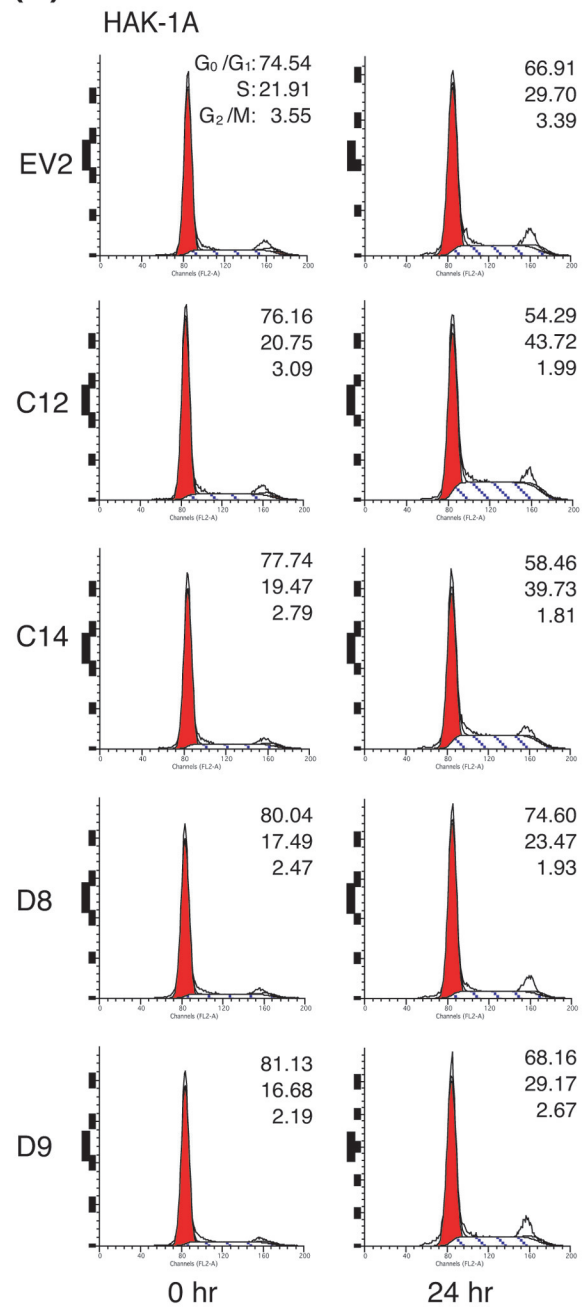

Supplement: NIHMS472462-supplement-Supp_Fig_S1-S4.pdf [file NIHMS472462-supplement-Supp_Fig_S1-S4.pdf]
